# Supplementary material for: Description of two fatal cases of melioidosis in Mexican children with acute pneumonia: case report
Source: PubMed Central journal article supplement (PMC7903701; doi:10.1186/s12879-021-05910-5), 2021-02-23
Supplement: 12879_2021_5910_MOESM2_ESM.pdf [file 12879_2021_5910_MOESM2_ESM.pdf]

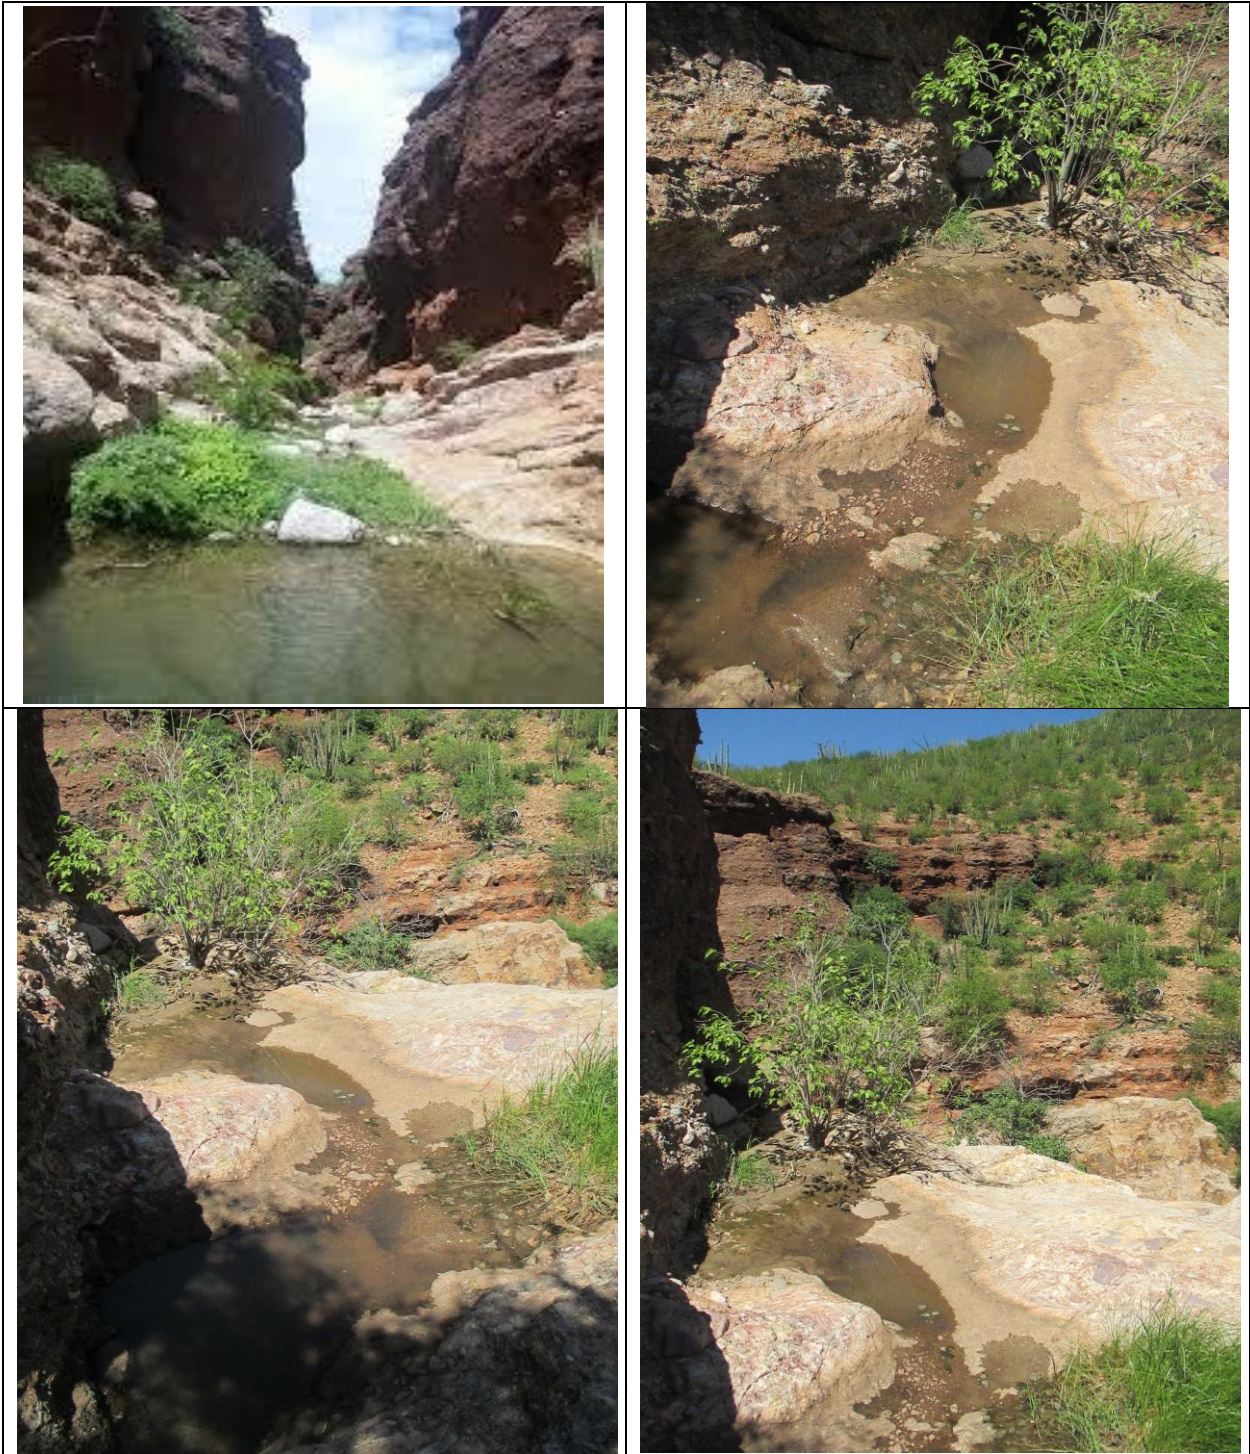

Figure S2. Images of Cajón del Chotaqui in Huásabas, Sonora, México. Pictures were taken during the sampling of water, sediment and soil for *Burkholderia pseudomallei* isolation by the authors of this study.
